# Supplementary material
Source: Springer Nature journal article supplement (https://www.springermedizin.de/resource/supplementary/12936_2012_2717_MOESM6_ESM.pdf/9544116)

**a**

Prevalence

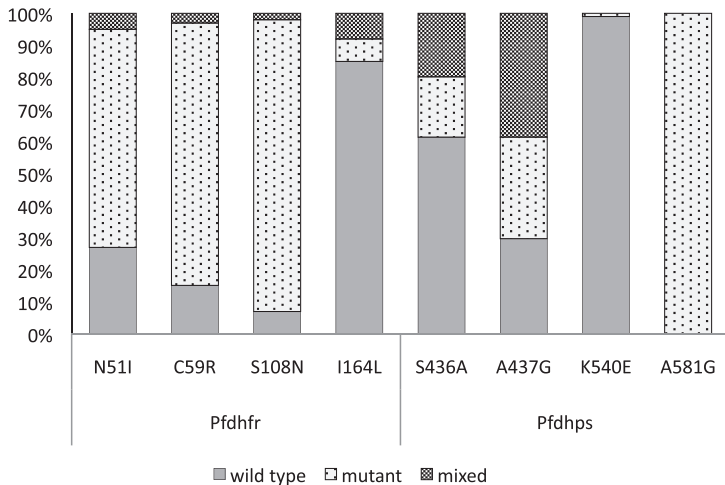**b**

Prevalence

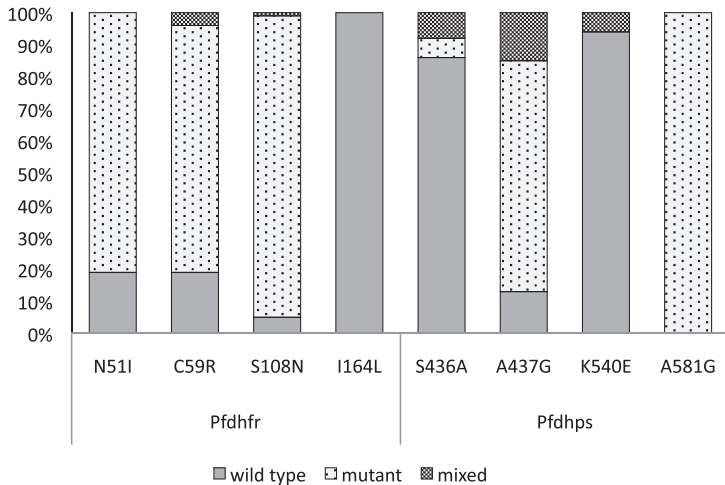

Supplement: MOESM6 [file 9544116]
